# Supplementary material for: Effect of CETP inhibition with evacetrapib in patients with diabetes mellitus enrolled in the ACCELERATE trial
Source: PubMed Central journal article supplement — BMJ Open Diabetes Res Care. 2020 Mar 15;8(1):e000943. doi: 10.1136/bmjdrc-2019-000943 (PMC7073792; doi:10.1136/bmjdrc-2019-000943), 2020-03-15
Supplement: bmjdrc-2019-000943supp001.pdf [file bmjdrc-2019-000943supp001.pdf]

## Supplement

**Table 4S. Characteristics of Patients with Diabetes Mellitus at Baseline Randomized to Evacetrapib or Placebo.**

|                                 | <b>Evacetrapib<br/>(N = 4,127)</b> | <b>Placebo<br/>(N = 4,109)</b> | <b>P-value</b> |
|---------------------------------|------------------------------------|--------------------------------|----------------|
| Mean Age in Years $\pm$ SD      | 65.3 $\pm$ 8.7                     | 65.7 $\pm$ 8.7                 | 0.08           |
| Male sex (%)                    | 76                                 | 76                             | 0.85           |
| Race – (%)                      |                                    |                                | 0.94           |
| White                           | 78                                 | 79                             |                |
| Black                           | 2.9                                | 3.0                            |                |
| Asian                           | 13                                 | 13                             |                |
| Other                           | 5.5                                | 5.2                            |                |
| Mean Body Mass Index $\pm$ SD   | 31.2 $\pm$ 6.0                     | 31.1 $\pm$ 5.8                 | 0.45           |
| Index diagnosis (%)             |                                    |                                |                |
| Recent ACS 30-365 days          | 16                                 | 16                             | 0.81           |
| Cerebrovascular disease         | 21                                 | 21                             | 0.85           |
| Peripheral arterial disease     | 17                                 | 16                             | 0.36           |
| CAD                             | 93                                 | 93                             | 0.85           |
| Cardiovascular risk factors (%) |                                    |                                |                |
| Hypertension                    | 91                                 | 92                             | 0.29           |
| Current smoker                  | 15                                 | 14                             | 0.61           |
| Prior myocardial infarction     | 60                                 | 60                             | 0.76           |
| Prior PCI                       | 70                                 | 71                             | 0.30           |
| Prior CABG                      | 34                                 | 32                             | 0.16           |
| Prior heart failure             | 15                                 | 15                             | 0.90           |
| COPD                            | 11                                 | 10                             | 0.17           |
| Renal Impairment                | 11                                 | 10                             | 0.41           |
| Lipids – mg/dl                  |                                    |                                |                |
| Mean LDL cholesterol            | 80 $\pm$ 28                        | 80 $\pm$ 27                    | 0.11           |
| Mean HDL cholesterol            | 44 $\pm$ 11                        | 44 $\pm$ 11                    | 0.57           |
| Median Triglyceride (IQR)       | 137 (100, 187)                     | 136 (99, 186)                  | 0.31           |
| Mean Apolipoprotein A1          | 137 $\pm$ 25                       | 137 $\pm$ 25                   | 0.98           |
| Mean Apolipoprotein B           | 79 $\pm$ 22                        | 78 $\pm$ 21                    | 0.03           |
| Median lipoprotein (a) (IQR)    | 27 (10, 98)                        | 28 (11, 100)                   | 0.53           |
| Median Hs CRP (IQR) ( mg/l)     | 1.6 (0.77, 3.5)                    | 1.5 (0.74, 3.4)                | 0.41           |
| Medications – (%)               |                                    |                                |                |
| Any statin                      | 96                                 | 96                             | 0.35           |
| High intensity statin           | 43                                 | 43                             | 0.69           |
| ACEi/ARB                        | 81                                 | 80                             | 0.73           |
| Aspirin                         | 84                                 | 83                             | 0.77           |

**Table 5S. Characteristics of Patients without Diabetes Mellitus at Baseline Randomized to Evacetrapib or Placebo.**

|                                 | <b>Evacetrapib<br/>(N = 1,911)</b> | <b>Placebo<br/>(N = 1,945)</b> | <b>P-value</b> |
|---------------------------------|------------------------------------|--------------------------------|----------------|
| Mean Age in Years ± SD          | 62.2 ± 10.4                        | 62.2 ± 10.5                    | 0.92           |
| Male sex (%)                    | 78                                 | 79                             | 0.80           |
| Race – (%)                      |                                    |                                | 0.20           |
| White                           | 91                                 | 91                             |                |
| Black                           | 1.1                                | 1.7                            |                |
| Asian                           | 5.2                                | 4.9                            |                |
| Other                           | 3.1                                | 2.4                            |                |
| Mean Body Mass Index ± SD       | 28.3 ± 4.6                         | 28.3 ± 4.8                     | 0.79           |
| Index diagnosis (%)             |                                    |                                |                |
| Recent ACS 30-365 days          | 61                                 | 62                             | 0.30           |
| Cerebrovascular disease         | 25                                 | 25                             | 0.96           |
| Peripheral arterial disease     | 27                                 | 24                             | 0.08           |
| CAD                             | 83                                 | 83                             | 0.60           |
| Cardiovascular risk factors (%) |                                    |                                |                |
| Hypertension                    | 78                                 | 78                             | 0.77           |
| Current smoker                  | 21                                 | 19                             | 0.12           |
| Prior myocardial infarction     | 83                                 | 83                             | 0.93           |
| Prior PCI                       | 73                                 | 74                             | 0.30           |
| Prior CABG                      | 19                                 | 21                             | 0.39           |
| Prior heart failure             | 11                                 | 11                             | 0.68           |
| COPD                            | 10                                 | 10                             | 0.72           |
| Renal Impairment                | 5                                  | 5                              | 0.69           |
| Lipids – mg/dl                  |                                    |                                |                |
| Mean LDL cholesterol            | 84 ± 29                            | 84 ± 30                        | 0.60           |
| Mean HDL cholesterol            | 48 ± 12                            | 48 ± 12                        | 0.38           |
| Median Triglyceride (IQR)       | 114 (87, 159)                      | 113 (85, 159)                  | 0.88           |
| Mean Apolipoprotein A1          | 143 ± 26                           | 142 ± 26                       | 0.33           |
| Mean Apolipoprotein B           | 78 ± 23                            | 79 ± 23                        | 0.46           |
| Median lipoprotein (a) (IQR)    | 34 (14, 128)                       | 31 (11, 121)                   | 0.57           |
| Median Hs CRP (IQR) ( mg/l)     | 1.5 (0.69, 3.0)                    | 1.4 (0.73, 3.0)                | 0.88           |
| Medications – (%)               |                                    |                                |                |
| Any statin                      | 97                                 | 97                             | 0.63           |
| High intensity statin           | 54                                 | 55                             | 0.55           |
| ACEi/ARB                        | 72                                 | 73                             | 0.53           |
| Aspirin                         | 82                                 | 80                             | 0.17           |

**Table 6S. Multivariable model for the primary composite endpoint by treatment assigned amongst patients with diabetes mellitus.**

| <b>Variable</b>            | <b>HR</b> | <b>95% CI</b> | <b>P-Value</b> |
|----------------------------|-----------|---------------|----------------|
| Treatment with Evacetrapib | 0.95      | (0.84, 1.06)  | 0.35           |
| Age*                       | 1.05      | (0.98, 1.13)  | 0.16           |
| Male                       | 1.03      | (0.90, 1.18)  | 0.67           |
| Coronary Artery Disease    | 1.71      | (1.29, 2.26)  | < 0.001        |
| Cerebral Vascular Disease  | 1.43      | (1.25, 1.63)  | < 0.001        |
| Peripheral Artery Disease  | 1.33      | (1.15, 1.55)  | < 0.001        |
| Renal Impairment           | 1.25      | (1.06, 1.48)  | 0.010          |
| Hypertension               | 1.47      | (1.13, 1.91)  | 0.004          |
| Heart Failure              | 1.55      | (1.35, 1.78)  | < 0.001        |
| Smoker                     | 1.18      | (1.00, 1.39)  | 0.05           |
| LDL*                       | 1.03      | (1.01, 1.05)  | 0.002          |

\* Hazard ratio per 10 units

**Table 7S. Multivariable model for the primary composite endpoint by treatment assigned amongst patients without diabetes mellitus.**

| <b>Variable</b>            | <b>HR</b> | <b>95% CI</b> | <b>P-Value</b> |
|----------------------------|-----------|---------------|----------------|
| Treatment with Evacetrapib | 1.14      | (0.93, 1.40)  | 0.20           |
| Age*                       | 1.08      | (0.97, 1.21)  | 0.15           |
| Male                       | 0.89      | (0.70, 1.13)  | 0.32           |
| Coronary Artery Disease    | 2.56      | (1.79, 3.67)  | < 0.001        |
| Cerebral Vascular Disease  | 1.28      | (1.01, 1.62)  | 0.04           |
| Peripheral Artery Disease  | 1.33      | (1.05, 1.68)  | 0.02           |
| Renal Impairment           | 0.99      | (0.64, 1.52)  | 0.95           |
| Hypertension               | 1.54      | (1.15, 2.07)  | 0.004          |
| Heart Failure              | 1.27      | (0.95, 1.68)  | 0.10           |
| Smoker                     | 0.93      | (0.71, 1.22)  | 0.59           |
| LDL*                       | 1.05      | (1.02, 1.08)  | 0.003          |

\* Hazard ratio per 10 units
